# Supplementary material for: Predicting colorectal cancer microsatellite instability with a self-attention-enabled convolutional neural network
Source: PubMed Central journal article supplement — Cell Rep Med. 2023 Jan 30;4(2):100914. doi: 10.1016/j.xcrm.2022.100914 (PMC9975100; doi:10.1016/j.xcrm.2022.100914), 2023-01-30
Supplement: mmc1.pdf [file mmc1.pdf]

**Cell Reports Medicine, Volume 4**

**Supplemental information**

**Predicting colorectal cancer microsatellite  
instability with a self-attention-enabled  
convolutional neural network**

**Xiaona Chang, Jianchao Wang, Guanjun Zhang, Ming Yang, Yanfeng Xi, Chenghang Xi, Gang Chen, Xiu Nie, Bin Meng, and Xueping Quan**

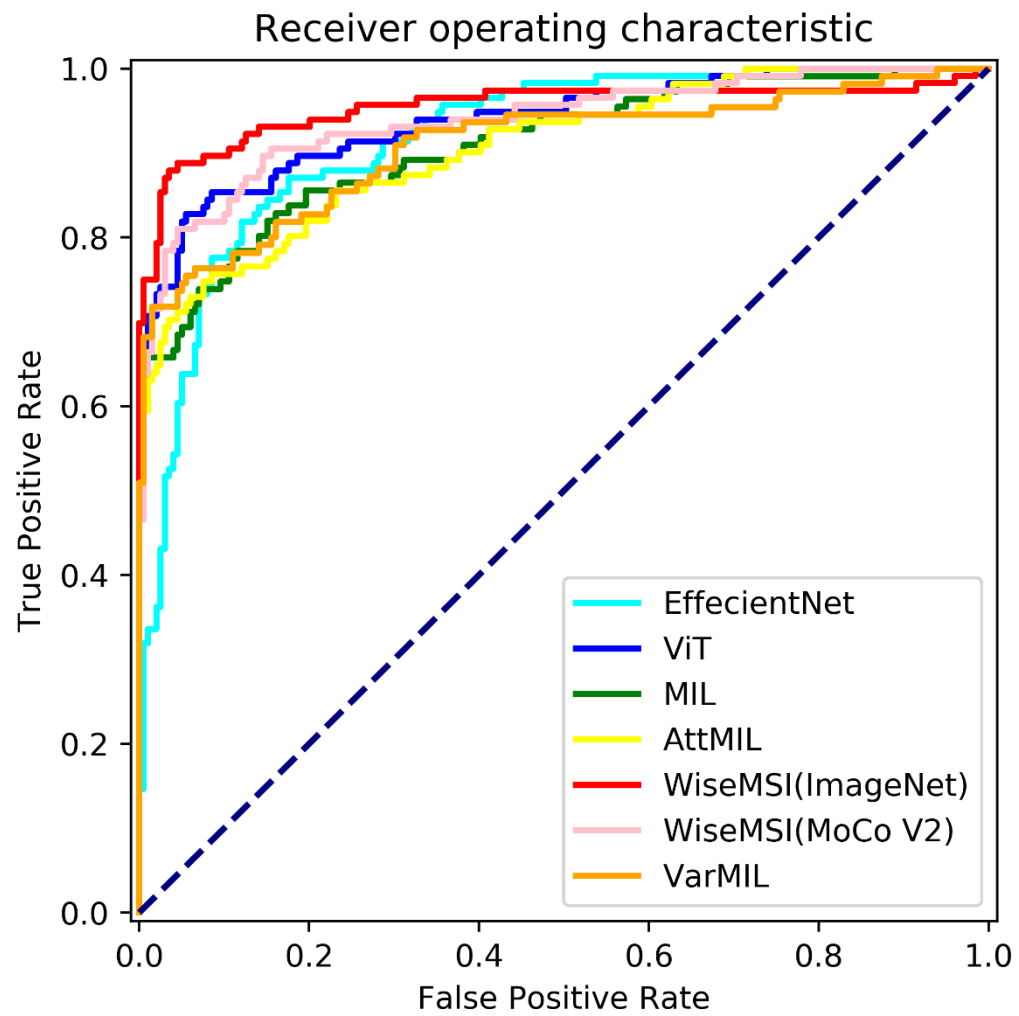

**Supplemental Figure 1.** The ROC curves of seven models. EfficientNet (cyan), Vit (blue), MIL (green), AttMIL (yellow), VarMIL (Orange), WiseMSI (red), that used

pretrained ImageNet feature extractor, and the WiseMSI (pink) using self-trained MocoV2 feature extractor. Related to Table 3.

**A**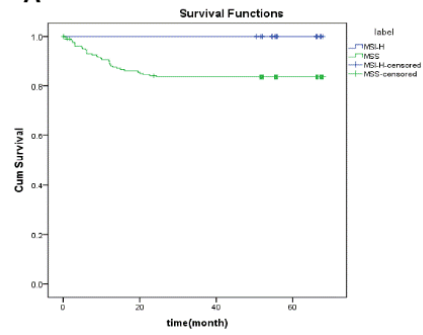**B**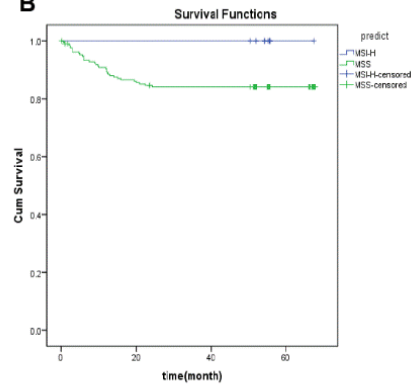**C**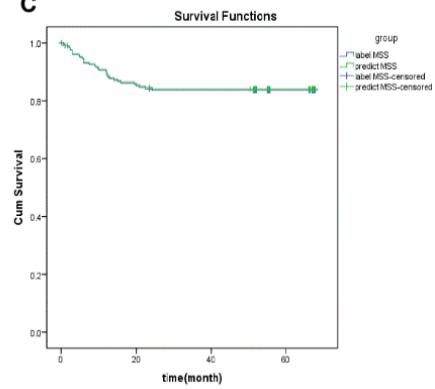

**Supplemental Figure 2** Kaplan–Meier-estimated disease-free survival (DFS) curves of CRC patients from the TSMCC Cohort.

(A) DFS curves stratified by labeled MSI-H and MSS. (B) DFS curves stratified by MSI-H and MSS predicted by the CNN Wise MSI model combining self-attention mechanism. (C) The overlay of DFS curves of CRC patients with labeled and predicted MSS.

Related to “QUANTIFICATION AND STATISTICAL ANALYSIS” section of STAR Methods.

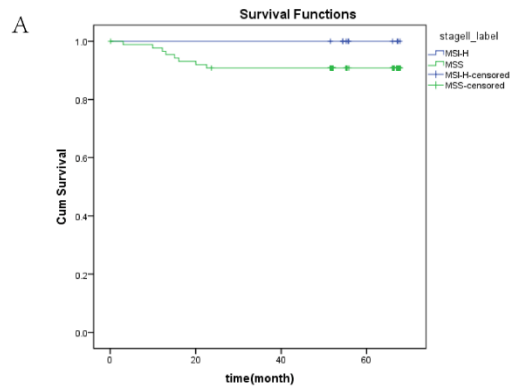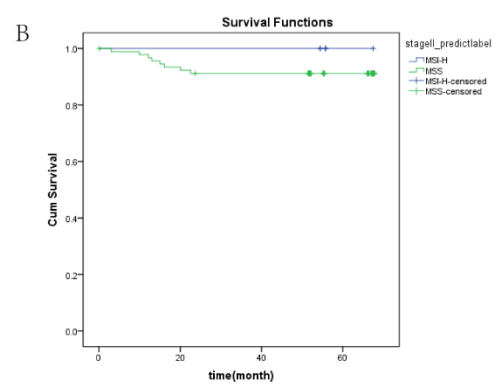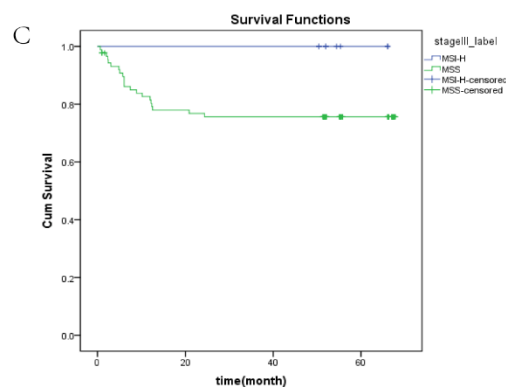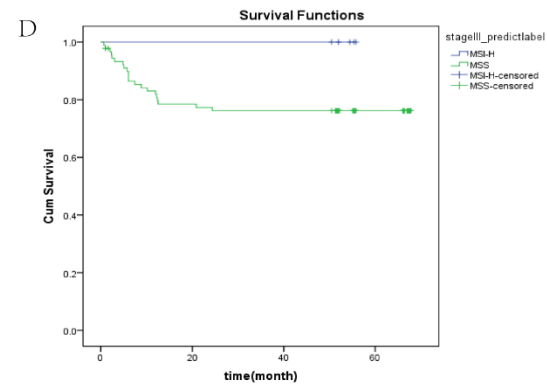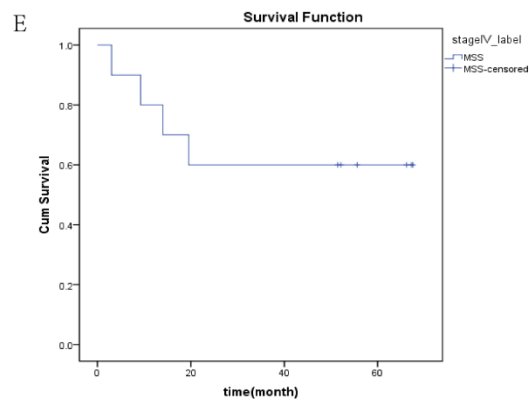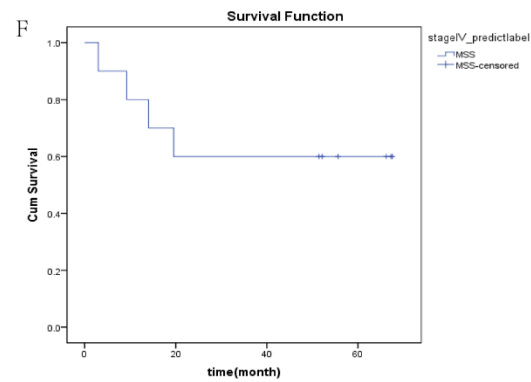

**Supplemental Figure 3.** Kaplan–Meier-estimated disease-free survival (DFS) curves of subgroups of CRC patients in Stage II - IV from the TSMCC Cohort. (

A) DFS curves of stage II patients with MSI status detected by PCR. (B) DFS curves of stage II patients with MSI status predicted by AI. (C) DFS curves of stage III patients with MSI status detected by PCR. (D) DFS curves of stage III patients with MSI status predicted by AI. (E) DFS curves of stage IV patients with MSI status detected by PCR. (F) DFS curves of stage IV patients with MSI status predicted by AI.

Related to “QUANTIFICATION AND STATISTICAL ANALYSIS” section of STAR Methods.

**Supplemental Table 2. Comparison of running time on five model performance for MSI prediction.**

Related to Table 3.

| Model        | Step                                                               | Avg time(s) |
|--------------|--------------------------------------------------------------------|-------------|
| WiseMSI      | Normal/Tumor Patch classifier<br>extract feature<br>MSI classifier | 807.797     |
| ViT          | 100 patches per slide MSI classifier                               | 3.298       |
| EfficientNet | 100 patches per slide MSI classifier                               | 4.003       |
| MIL          | extract feature<br>MSI classifier                                  | 825.540     |
| AttMIL       | extract feature<br>MSI classifier                                  | 825.955     |



**Supplemental Table 3. The performance for MSI prediction in multi ethnics.**

Related to Table 2.

| Race                             | MSS     | Specificity | MSI-H | Sensitivity | Accuracy |
|----------------------------------|---------|-------------|-------|-------------|----------|
| American Indian or Alaska native | 0/1     | 0           | -     | -           | 0        |
| Asian                            | 11/11   | 1           | 1/1   | 1           | 1        |
| Black or African American        | 32/59   | 0.542       | 7/9   | 0.778       | 0.574    |
| White                            | 105/240 | 0.438       | 37/43 | 0.860       | 0.502    |
| Not reported                     | 109/212 | 0.514       | 23/33 | 0.697       | 0.539    |

**Supplemental Table 4. WiseMSI model performance tested with TCGA-STAD data.**

Related to “WiseMSI on Other Cancer Type” section of STAR Methods.

| Model          | Specificity (95% CI) | Sensitivity (95% CI) | AUC (95% CI)         |
|----------------|----------------------|----------------------|----------------------|
| Self-attention | 0.963 (0.936, 0.991) | 0.185 (0.062, 0.307) | 0.750 (0.699, 0.802) |
| ViT            | 0.972 (0.948,0.997)  | 0.131 (0.030, 0.231) | 0.682 (0.635, 0.729) |

**Supplemental Table 5. Patient demographic and baseline characteristics stratified by MSI status by molecular typing and Wise MSI-based prediction.**

Related to Figure 4.

| Variables  | N           | label       |             | predict label |             | Fisher Exact sig(2-sided) P value |
|------------|-------------|-------------|-------------|---------------|-------------|-----------------------------------|
|            |             | MSI-H       | MSS         | MSI-H         | MSS         |                                   |
| Gender     |             |             |             |               |             |                                   |
| Male       | 139         | 10          | 129         | 6             | 133         | 0.441                             |
| Female     | 87          | 11          | 76          | 8             | 79          | 0.628                             |
| Age, years |             |             |             |               |             |                                   |
| mean±SD    | 60.56±11.27 | 56.67±11.11 | 60.96±11.24 | 55.29±6.81    | 60.91±11.43 |                                   |
| >=65       | 90          | 4           | 86          | 2             | 88          | 0.682                             |
| <65        | 136         | 17          | 119         | 12            | 124         | 0.432                             |
| Stage      |             |             |             |               |             |                                   |
| I          | 20          | 2           | 18          | 1             | 19          | 1                                 |
| II         | 99          | 11          | 88          | 7             | 92          | 0.459                             |

|                       |     |    |     |    |     |       |
|-----------------------|-----|----|-----|----|-----|-------|
| III                   | 97  | 8  | 89  | 6  | 91  | 0.783 |
| IV                    | 10  | 0  | 10  | 0  | 10  | 1     |
| Tumor differentiation |     |    |     |    |     |       |
| Low                   | 202 | 4  | 20  | 3  | 21  | 1     |
| Moderate              | 24  | 17 | 185 | 11 | 191 | 0.327 |
| Tumor location        |     |    |     |    |     |       |
| Colon                 | 216 | 13 | 203 | 6  | 210 | 0.158 |
| Rectum                | 10  | 8  | 2   | 8  | 2   | 1     |
| Laterality            |     |    |     |    |     |       |
| Left                  | 178 | 8  | 170 | 4  | 174 | 0.379 |
| Right                 | 38  | 5  | 33  | 2  | 36  | 0.43  |
| Lynch syndrome        |     |    |     |    |     |       |
| Yes                   | 142 | 9  | 133 | 3  | 139 | 0.137 |
| No                    | 84  | 12 | 72  | 11 | 73  | 1     |
